# Supplementary material
Source: HighWire-hosted journal article supplement (https://bjsm.bmj.com/content/53/17/1085)
Supplement: inline-supplementary-material-2 [file inline-supplementary-material-2.pdf]

Online appendix 2. Number of injuries overall and injuries with >7 days of estimated absence in female and male athletes in the Olympic sports (proportion of injured athletes, %).

| Olympic sport        | Female athletes   |              |                   | Male athletes     |              |                   |
|----------------------|-------------------|--------------|-------------------|-------------------|--------------|-------------------|
|                      | n                 | All injuries | Time loss >7 days | n                 | All injuries | Time loss >7 days |
| Ice sports           |                   |              |                   |                   |              |                   |
| Curling              | 56                | 1 (1.8)      | -                 | 56                | 8 (14.3)     | -                 |
| Ice hockey           | 196               | 43 (21.9)    | 1 (0.5)           | 299               | 39 (13.0)    | 2 (0.7)           |
| Skating              |                   |              |                   |                   |              |                   |
| Figure               | 77                | 5 (6.5)      | -                 | 76                | 8 (10.5)     | -                 |
| Short track          | 55                | 12 (21.8)    | -                 | 58                | 5 (8.6)      | 1 (1.7)           |
| Speed                | 82                | 4 (4.9)      | -                 | 102               | 17 (16.7)    | 1 (1.0)           |
| Ice track            |                   |              |                   |                   |              |                   |
| Bobsleigh            | 39                | 4 (10.3)     | -                 | 124               | 25 (20.2)    | -                 |
| Luge                 | 30                | 8 (26.7)     | 2 (6.7)           | 80                | 4 (5.0)      | -                 |
| Skeleton             | 20                | 1 (5.0)      | -                 | 30                | 3 (10.0)     | -                 |
| Snow sports          |                   |              |                   |                   |              |                   |
| Alpine skiing        | 134               | 26 (19.4)    | 6 (4.5)           | 188               | 32 (17.0)    | 2 (1.1)           |
| Freestyle skiing     |                   |              |                   |                   |              |                   |
| Aerials              | 25                | 7 (28.0)     | -                 | 25                | 3 (12.0)     | -                 |
| Halfpipe             | 24                | 5 (20.8)     | -                 | 27                | 9 (33.3)     | 4 (14.8)          |
| Moguls               | 30                | 2 (6.7)      | -                 | 30                | 1 (3.3)      | 1 (3.3)           |
| Ski cross            | 26                | 7 (26.9)     | 3 (11.5)          | 31                | 7 (22.6)     | 5 (16.1)          |
| Slopestyle           | 24                | 5 (20.8)     | -                 | 30                | 4 (13.3)     | 1 (3.3)           |
| Snowboarding         |                   |              |                   |                   |              |                   |
| Big air              | 29                | 3 (10.3)     | -                 | 40                | 5 (12.5)     | 2 (5.0)           |
| Halfpipe             | 24                | 2 (8.3)      | -                 | 30                | 6 (20.0)     | 1 (3.3)           |
| Slopestyle           | 27                | 7 (25.9)     | 2 (7.4)           | 39                | 7 (17.9)     | 5 (12.8)          |
| Snowboard cross      | 30                | 10 (33.3)    | 3 (10.0)          | 40                | 8 (20.0)     | 7 (17.5)          |
| Slalom               | 30                | 2 (6.7)      | -                 | 32                | 1 (3.1)      | -                 |
| Nordic skiing        |                   |              |                   |                   |              |                   |
| Biathlon             | 110               | 5 (4.5)      | -                 | 109               | -            | -                 |
| Cross-country skiing | 134               | 7 (5.2)      | -                 | 177               | 10 (5.6)     | -                 |
| Nordic combined      | -                 | -            | -                 | 55                | 1 (1.8)      | -                 |
| Ski jumping          | 35                | 3 (8.6)      | -                 | 66                | 4 (6.1)      | -                 |
| Total                | 1237 <sup>a</sup> | 169 (13.7)   | 17 (1.4)          | 1744 <sup>a</sup> | 207 (11.9)   | 32 (1.8)          |

<sup>a</sup>Data include 67 double-starters.
